# Supplementary material for: Co-modulation of TNFR1 and TNFR2 in an animal model of multiple sclerosis
Source: PubMed Central journal article supplement (PMC10149004; doi:10.1186/s12974-023-02784-z), 2023-04-30
Supplement: 12974_2023_2784_MOESM1_ESM.pdf [file 12974_2023_2784_MOESM1_ESM.pdf]

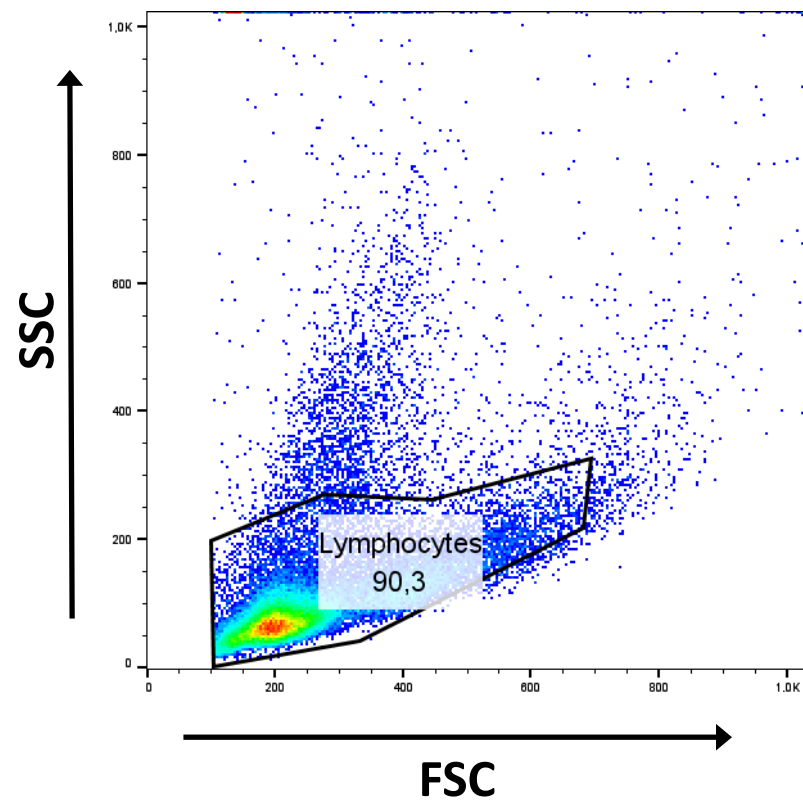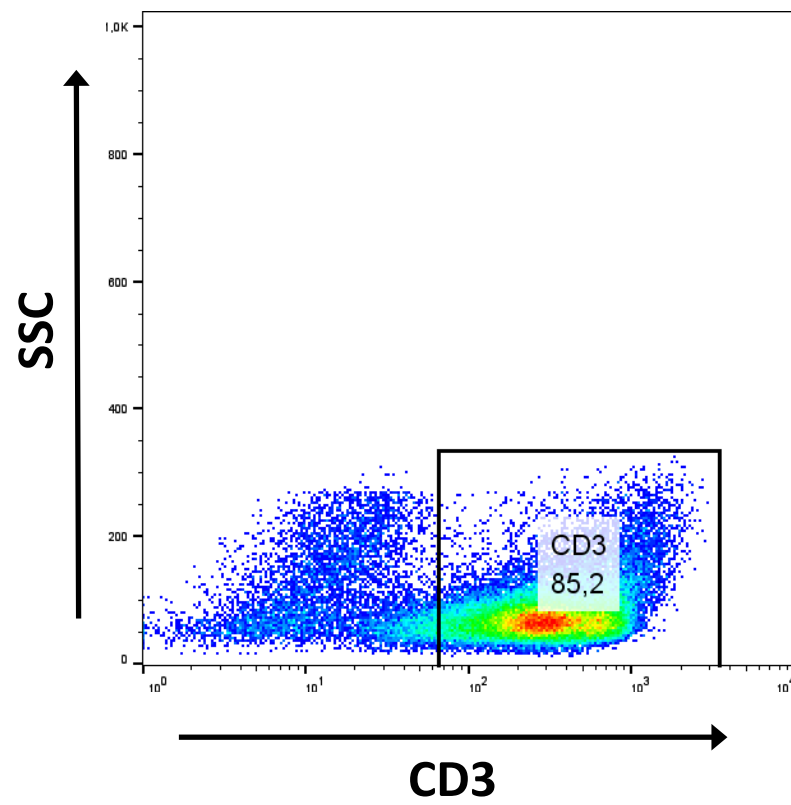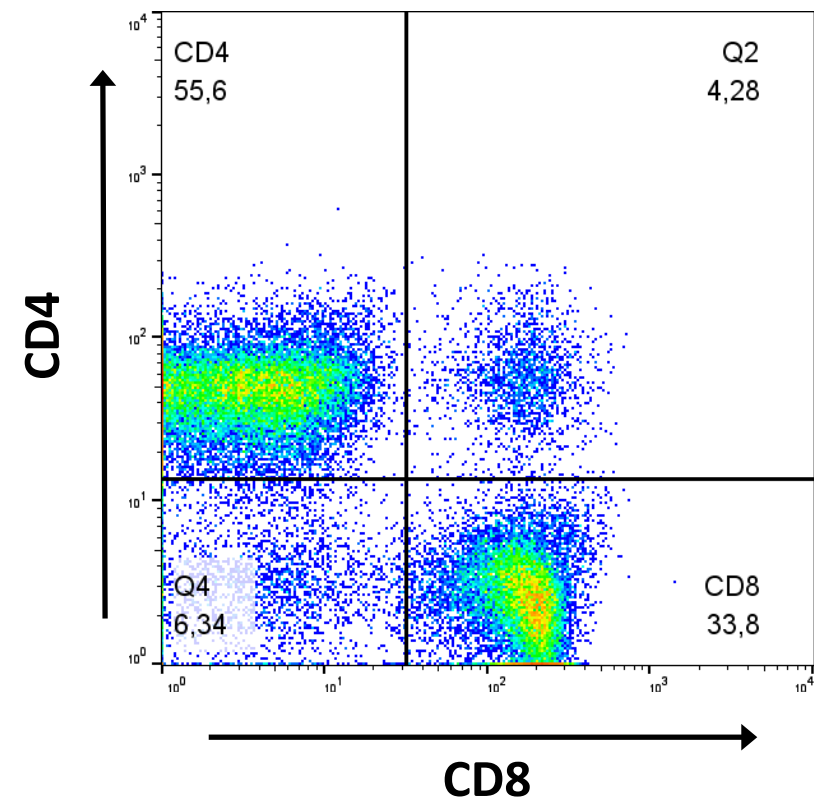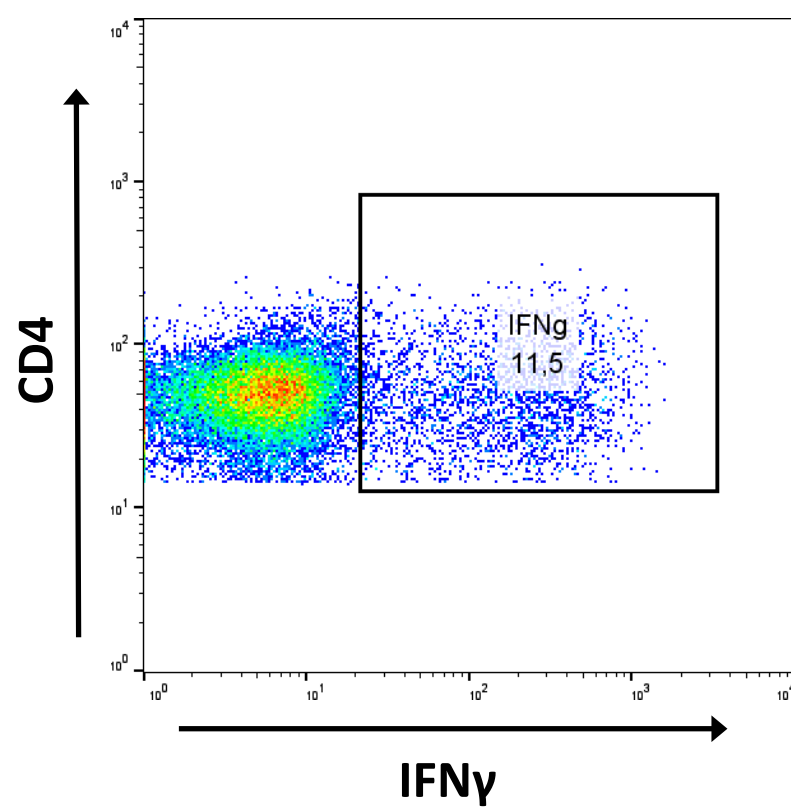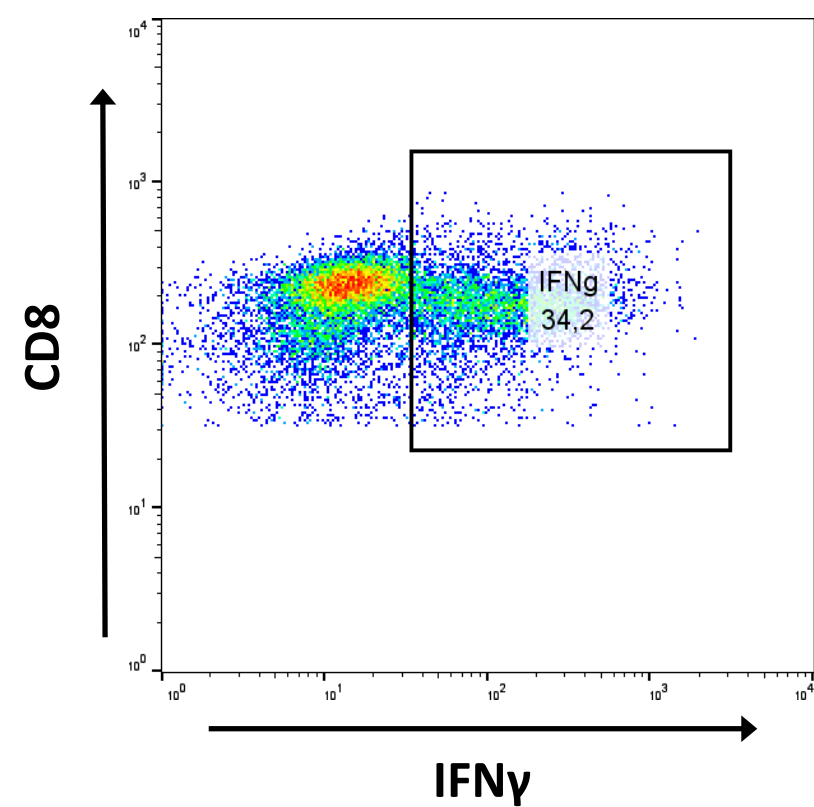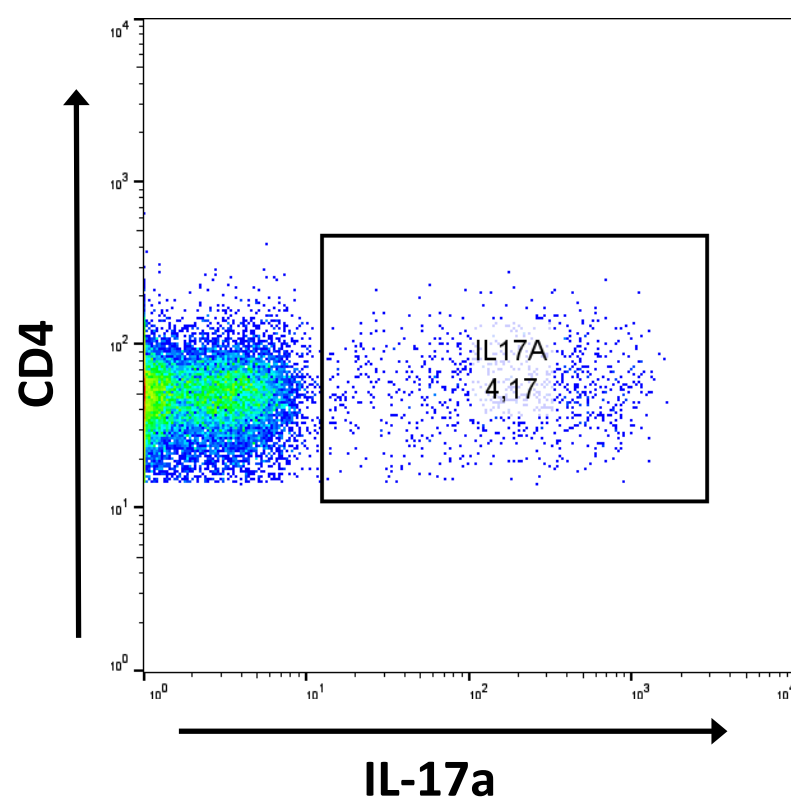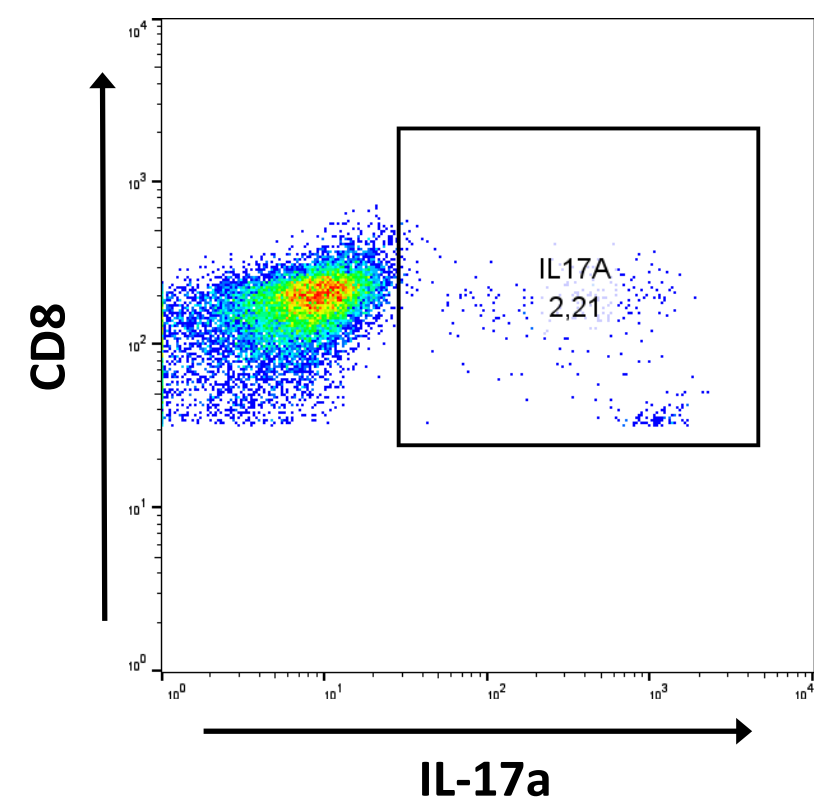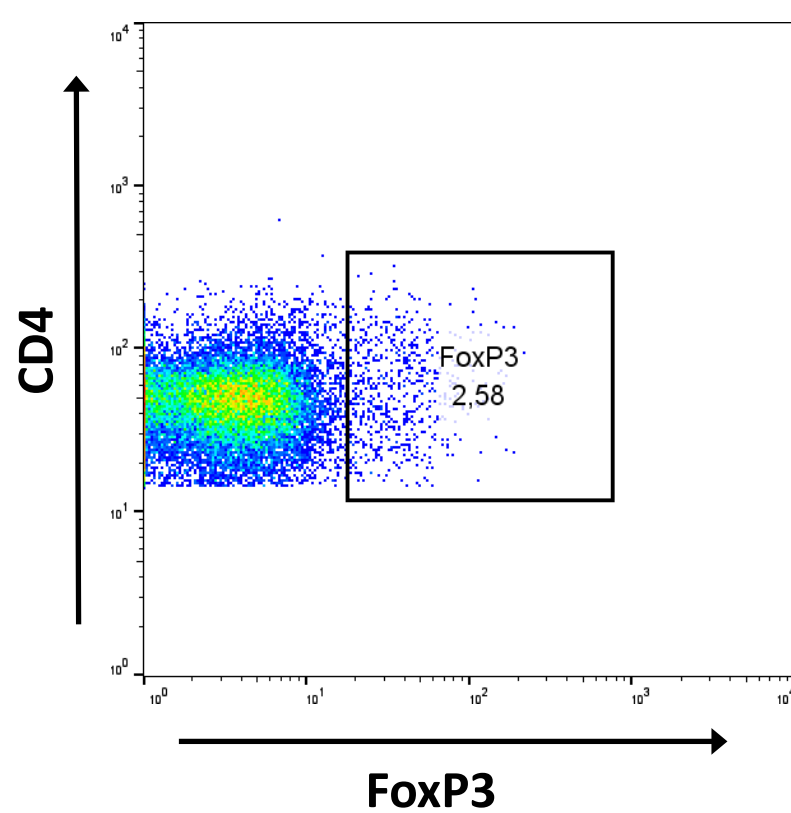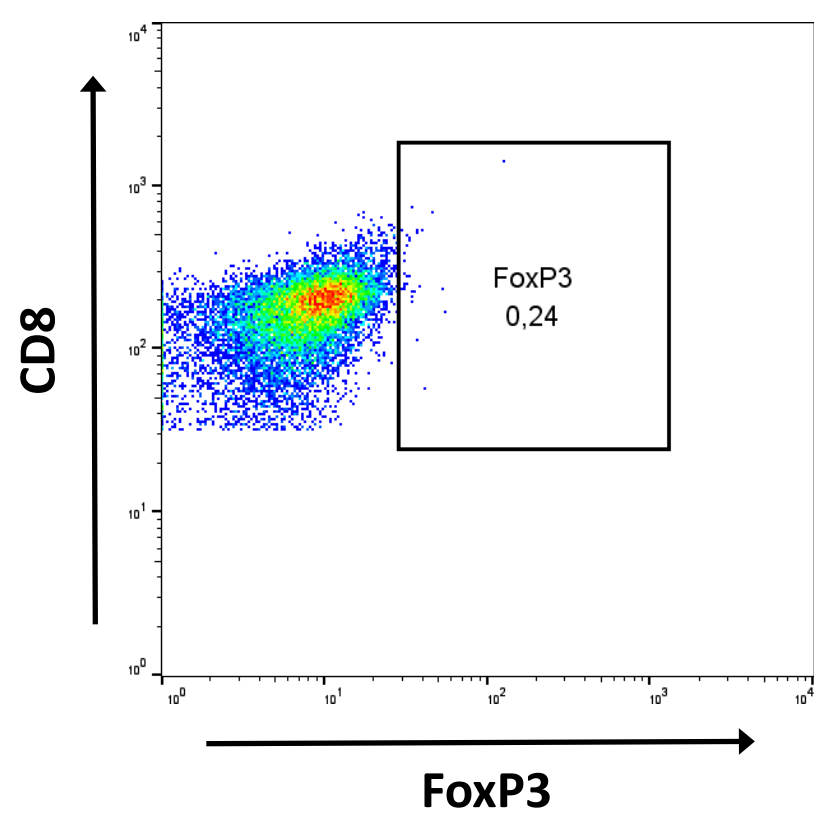

**Fig. S1.** Flow cytometry gating strategy. T cells were isolated and immunolabelled as indicated in the Methods. Representative dot plots (generated with FlowJo) are shown for the gating performed for data shown in Figure panels 2F and 2G. Cells were gated for lymphocytes based on forward (FSC) and side (SSC) scattering, before further gating for expression of CD3 and either CD4 or CD8. CD4<sup>+</sup> and CD8<sup>+</sup> T cells were subsequently assessed for the percentage co-expressing either IFN $\gamma$  (TH1 T cells), IL-17a (TH17 T cells) or FoxP3 (Tregs).
