# Supplementary material for: Co-modulation of TNFR1 and TNFR2 in an animal model of multiple sclerosis
Source: PubMed Central journal article supplement (PMC10149004; doi:10.1186/s12974-023-02784-z), 2023-04-30
Supplement: 12974_2023_2784_MOESM2_ESM.pdf [file 12974_2023_2784_MOESM2_ESM.pdf]

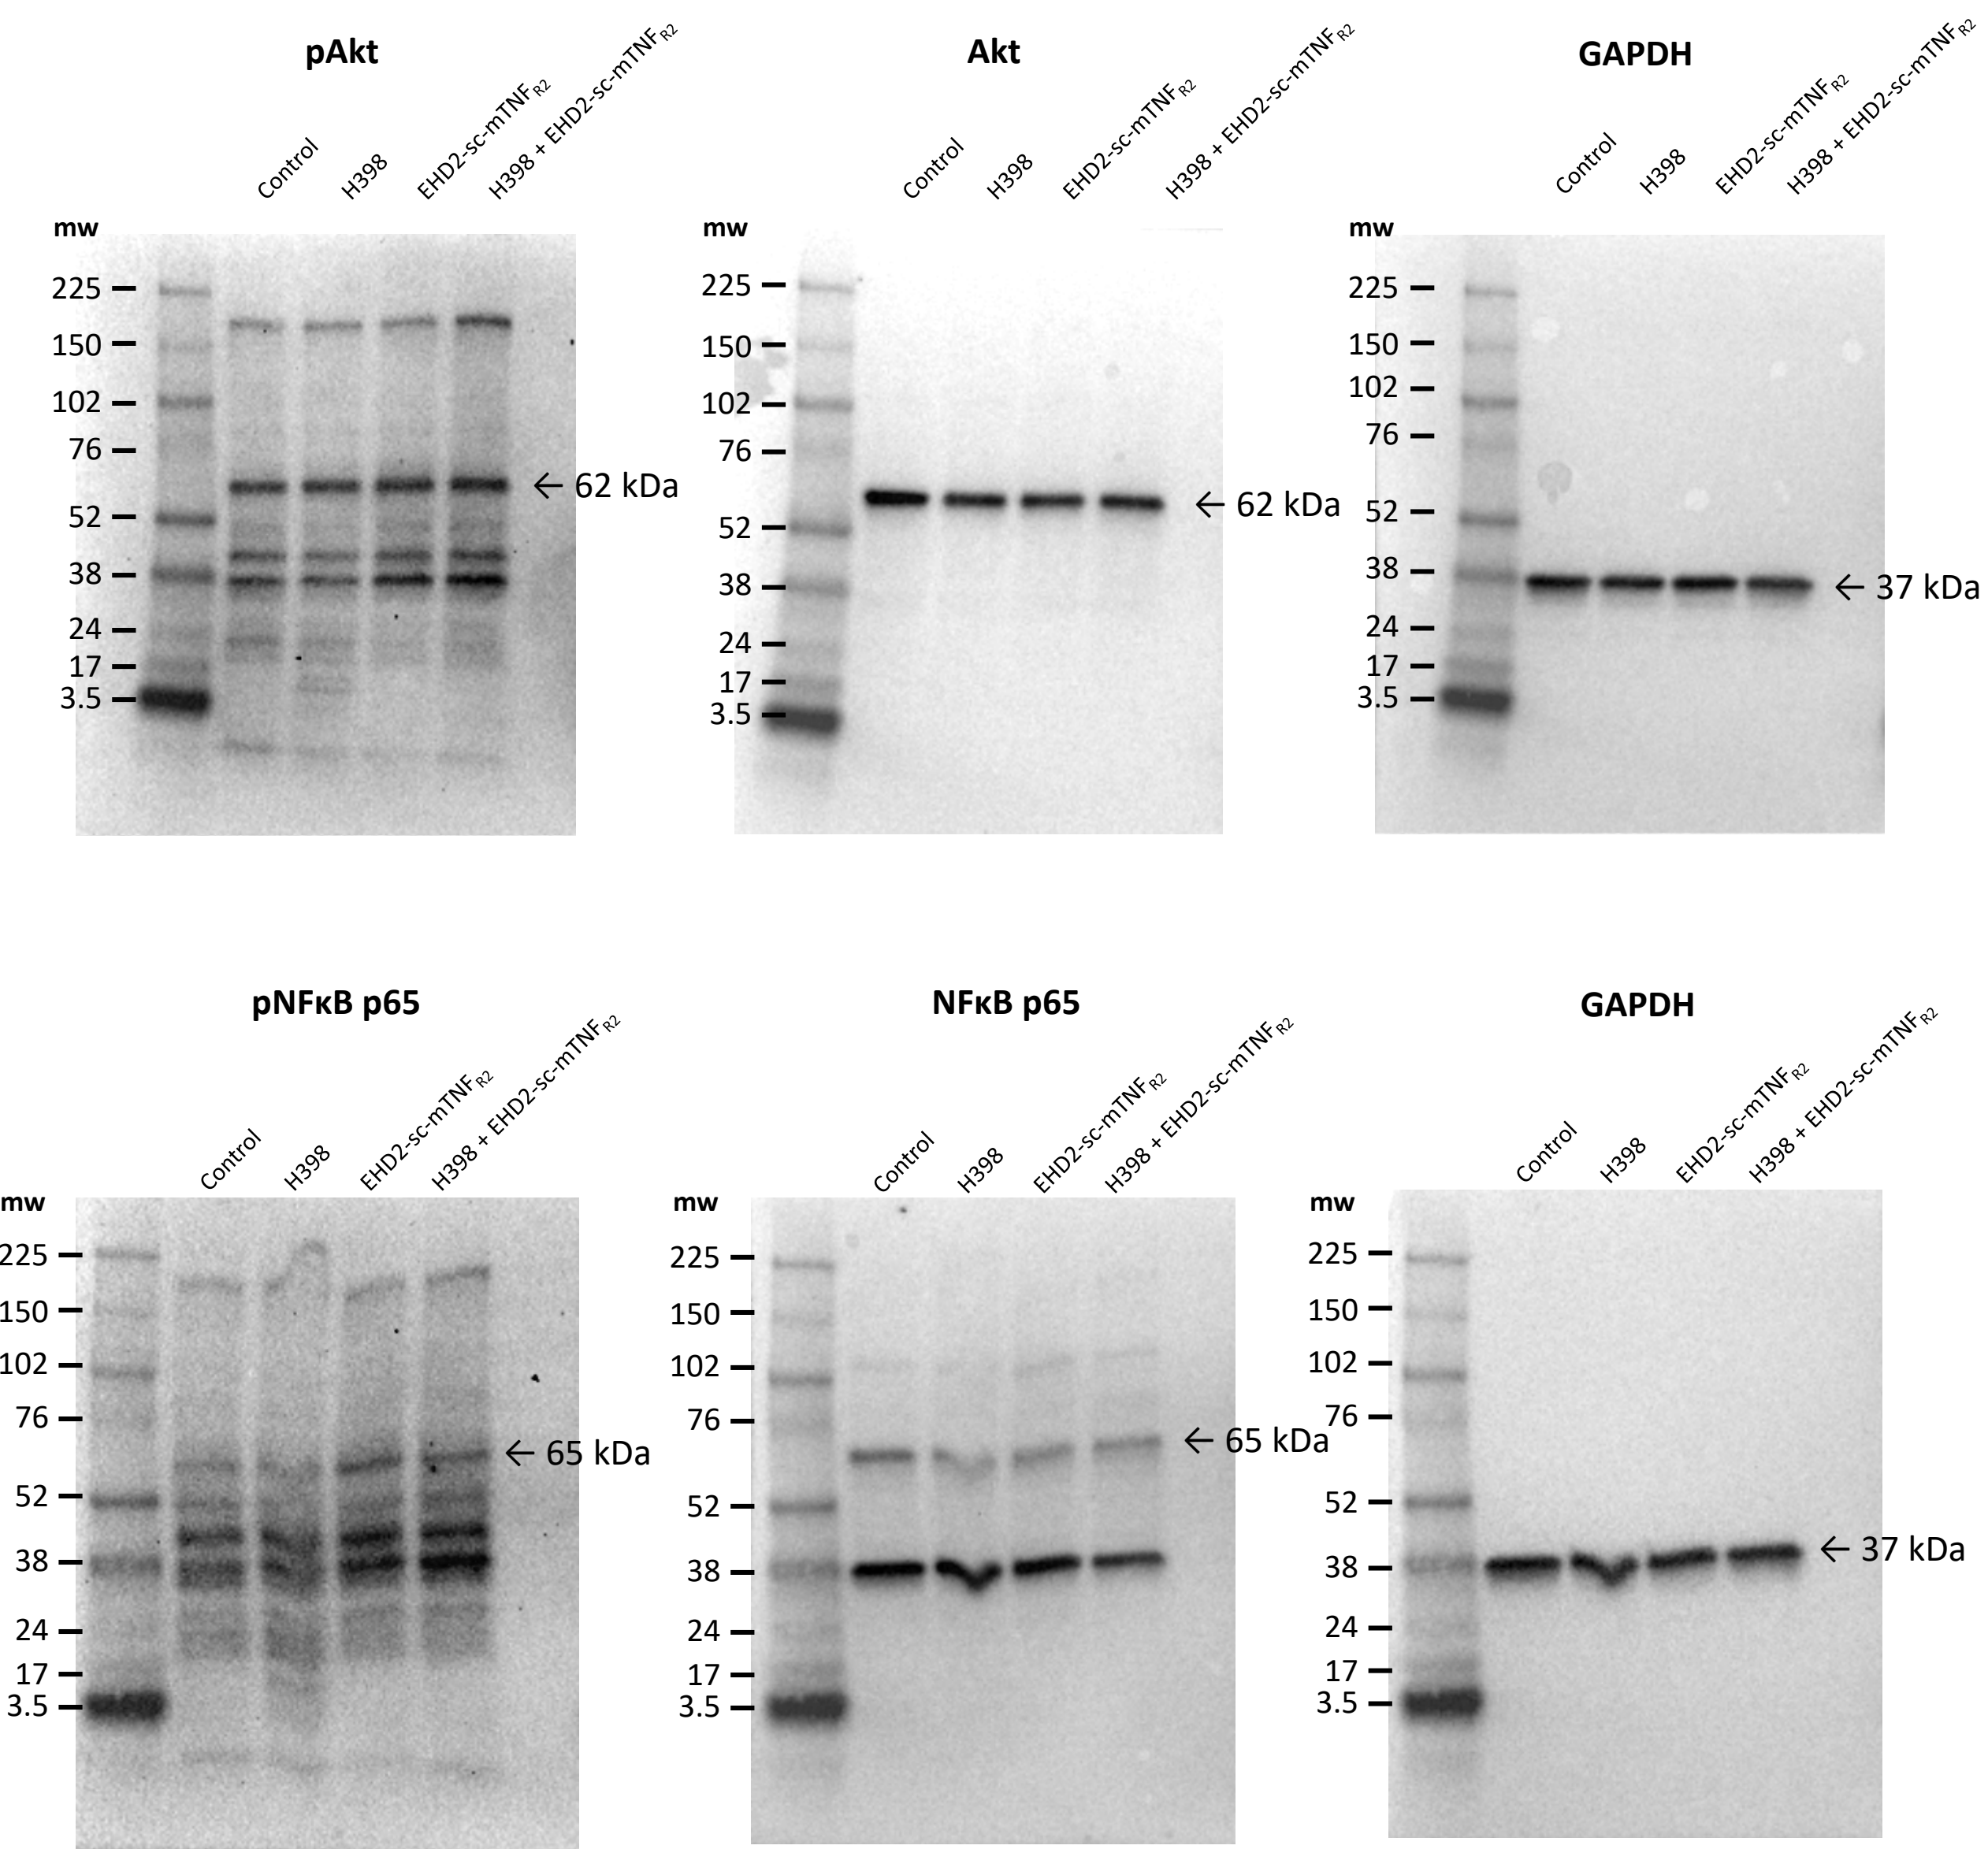

**Fig. S2.** Full uncropped Western blot images corresponding to (A) Figure 4G and (B) Figure 4J.
